# Supplementary figures and images for: Controllable growth of transition metal dichalcogenide multilayer flakes with kirigami structures
Source: Royal Society of Chemistry journal article supplement (doi:10.1039/c9ce01838g), 2020-01-01

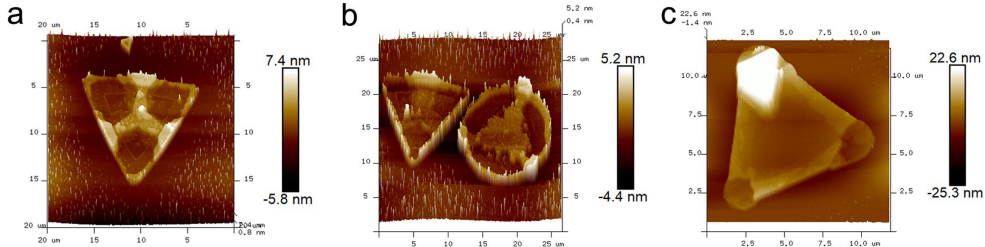

Supplement: c9ce01838g4.pdf [file c9ce01838g4.pdf]
